# Supplementary material
Source: PubMed Central journal article supplement (PMC6697537)
Supplement: EMS83996-supplement-SI.pdf [file EMS83996-supplement-SI.pdf]

## SUPPORTING INFORMATION

# Piezoelectric Barium Titanate Nanostimulators for the Treatment of Glioblastoma Multiforme

*Attilio Marino<sup>1,†,\*</sup>, Enrico Almici<sup>2,†</sup>, Simone Migliorin<sup>2</sup>, Christos Tapeinos<sup>1</sup>, Matteo Battaglini<sup>1,3</sup>,  
Valentina Cappello<sup>4</sup>, Marco Marchetti<sup>5,6</sup>, Giuseppe de Vito<sup>5,7</sup>, Riccardo Cicchi<sup>5,7</sup>, Francesco  
Saverio Pavone<sup>5,6,7</sup>, Gianni Ciofani<sup>1,2,\*</sup>*

<sup>1</sup>Istituto Italiano di Tecnologia, Smart Bio-Interfaces, Viale Rinaldo Piaggio 34, 56025 Pontedera, Italy

<sup>2</sup>Politecnico di Torino, Department of Mechanical and Aerospace Engineering, Corso Duca degli Abruzzi 24, 10129 Torino, Italy

<sup>3</sup>Scuola Superiore Sant'Anna, The Biorobotics Institute, Viale Rinaldo Piaggio 34, 56025 Pontedera, Italy

<sup>4</sup>Istituto Italiano di Tecnologia, Center for Nanotechnology Innovation, Piazza San Silvestro 12, 56127 Pisa, Italy

<sup>5</sup>European Laboratory for Nonlinear Spectroscopy (LENS), Via Nello Carrara 1, 50019 Sesto Fiorentino, Italy

<sup>6</sup>Università di Firenze, Department of Physics and Astronomy, Via Giovanni Sansone 1, 50019 Sesto Fiorentino, Italy

<sup>7</sup>National Institute of Optics, National Research Council (INO-CNR), Largo Enrico Fermi 6, 50125 Firenze, Italy

<sup>†</sup>These authors contributed equally to this work

<sup>\*</sup>CORRESPONDING AUTHORS:

[attilio.marino@iit.it](mailto:attilio.marino@iit.it); [gianni.ciofani@iit.it](mailto:gianni.ciofani@iit.it)

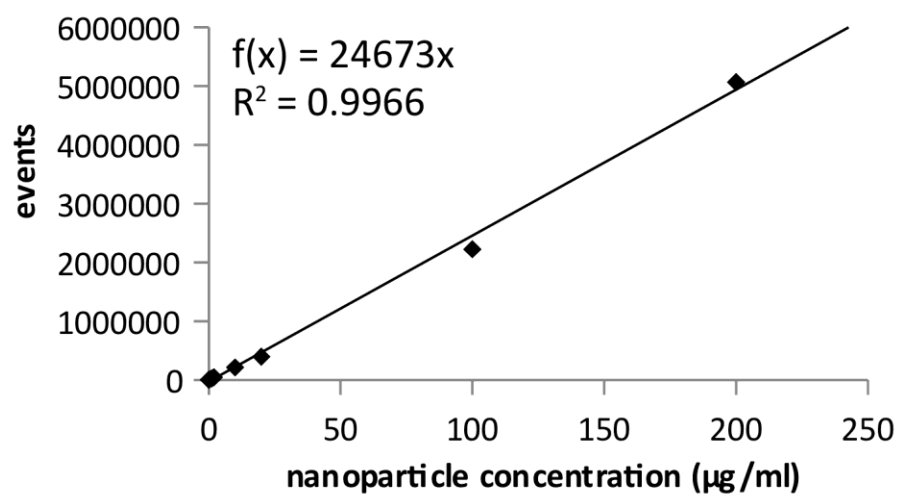

**Figure S1.** Calibration curve reporting the number of events recorded by flow cytometry as a function of nanoparticle concentration.

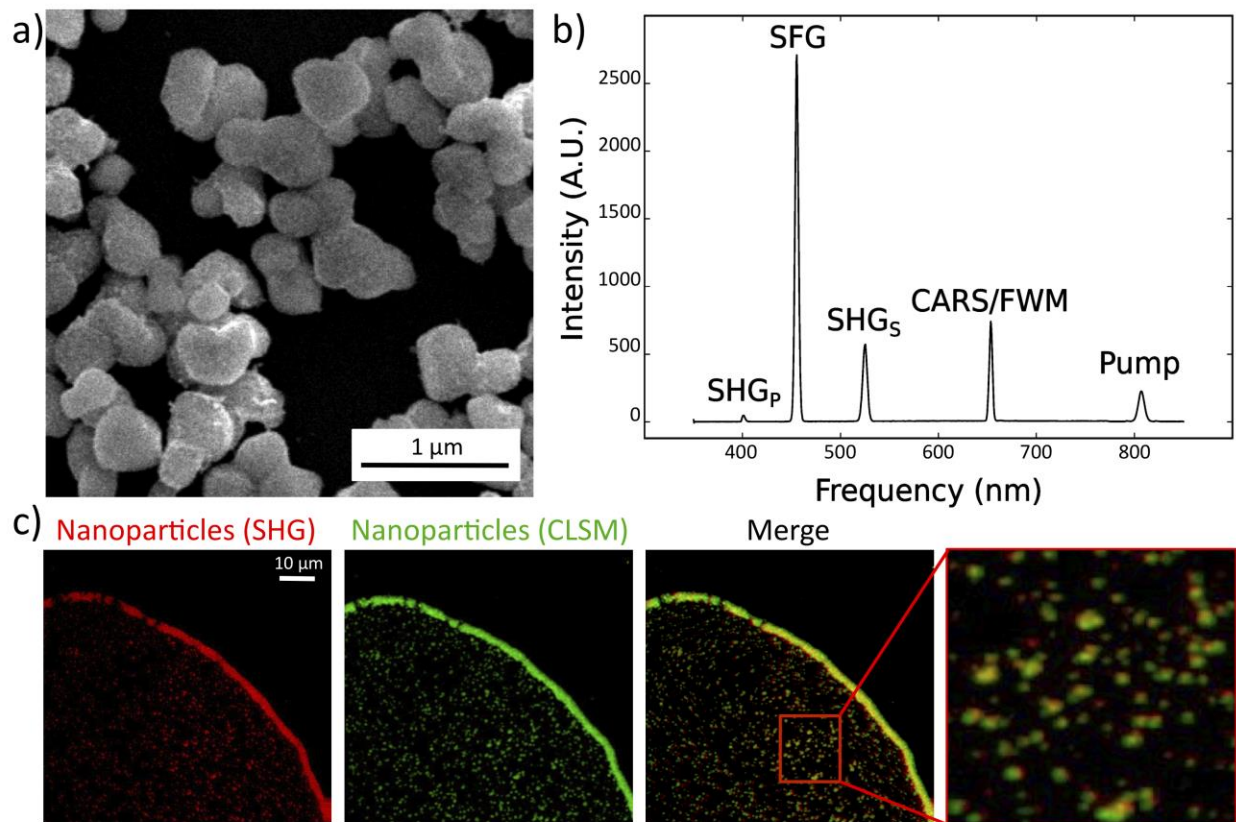

**Figure S2.** a) Scanning electron microscopy (SEM) imaging, b) emission spectrum (induced by pump-and-probe beam and Stokes beam illumination), and c) second harmonic generation (SHG, in red) and confocal laser scanning microscopy (CLSM, in green) imaging of the nanoparticles.

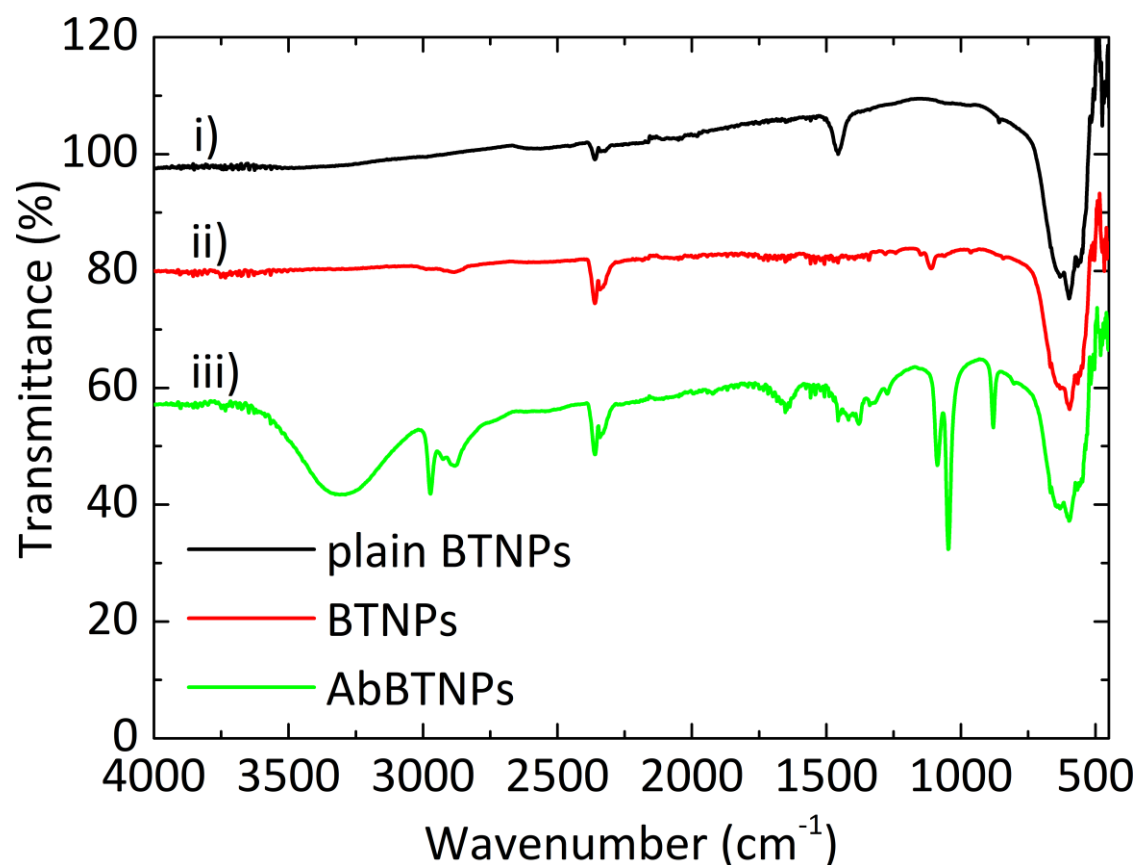

**Figure S3.** FT-IR spectra of *i*) non-functionalized plain BTNPs (plain BTNPs), *ii*) BTNPs coated with DSPE-PEG (BTNPs), and *iii*) of BTNPs coated with DSPE-PEG and functionalized with an antibody against the transferrin receptor (AbBTNPs).

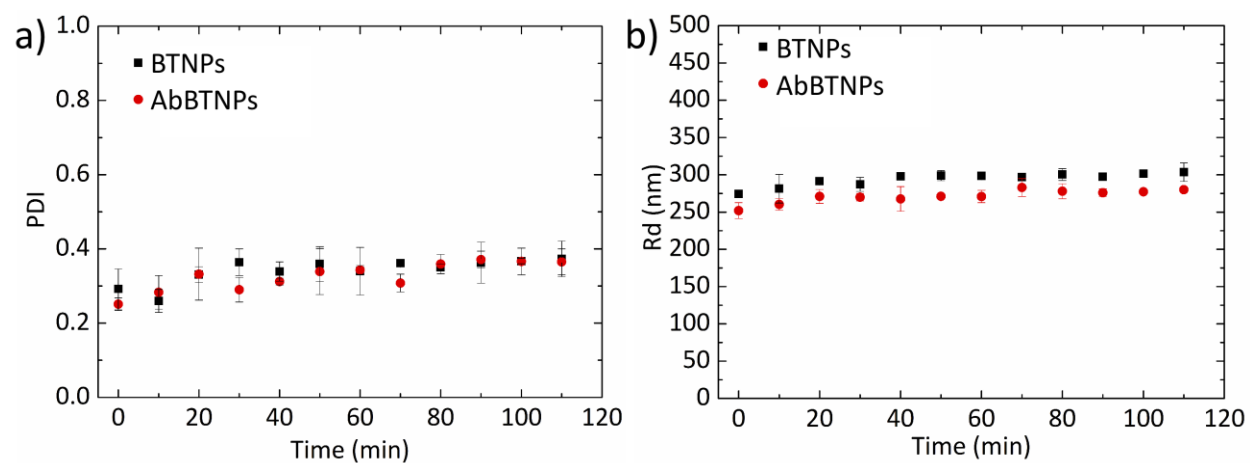

**Figure S4** Nanoparticle stability. a) polydispersity index (PDI) and b) hydrodynamic diameter ( $R_d$ ) of BTNPs and AbBTNPs at different time points.

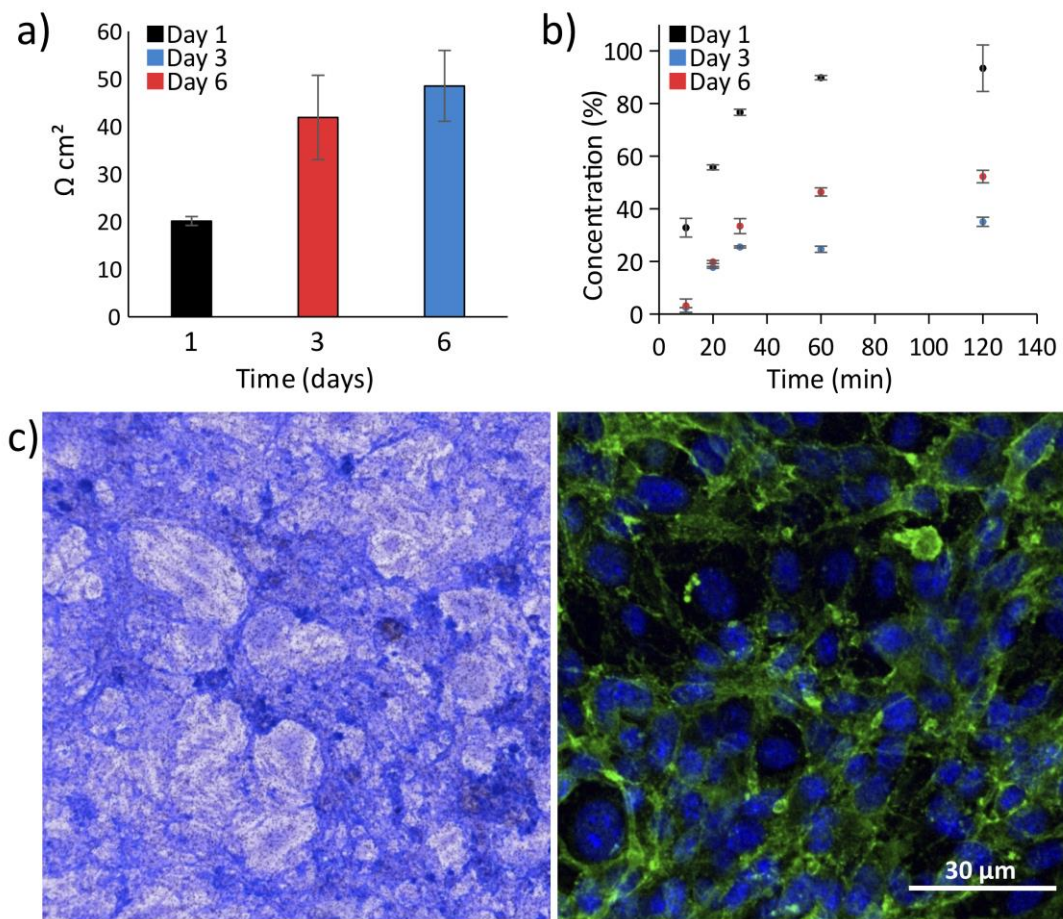

**Figure S5.** Characterization of the BBB model developed on 3  $\mu\text{m}$  porous transwell. a) Transendothelial electric resistance (TEER) and b) permeability to FITC-conjugated dextran of the model at day 1, 3 and 6 of culture. c) Coomassie (left image) and immunofluorescence staining (right image; ZO-1 in green and nuclei in blue) of the BBB model after 3 days of maturation.

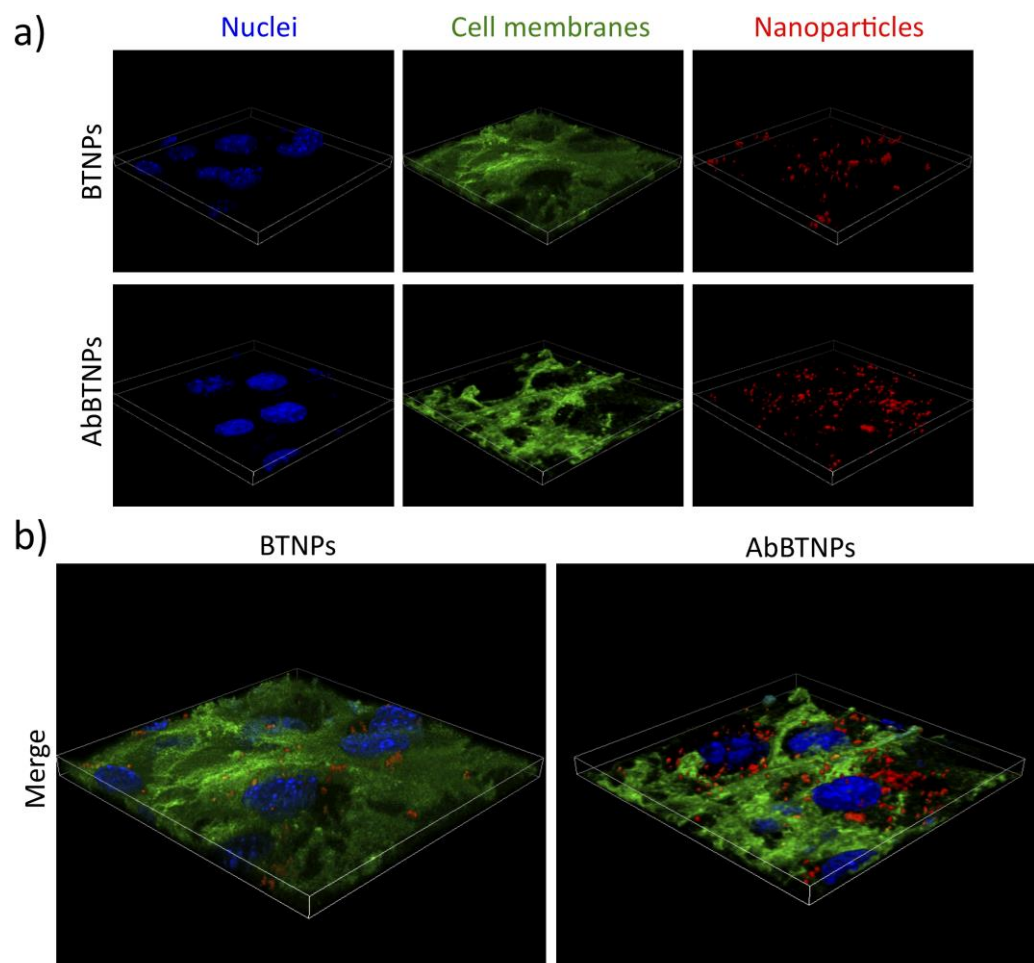

**Figure S6.** 3D reconstructions of confocal Z-stack acquisitions of nanoparticles (BTNPs / AbBTNPs in red) and of bEnd.3 plasma membranes (in green). Separated and merged signals are shown in a) and b), respectively.

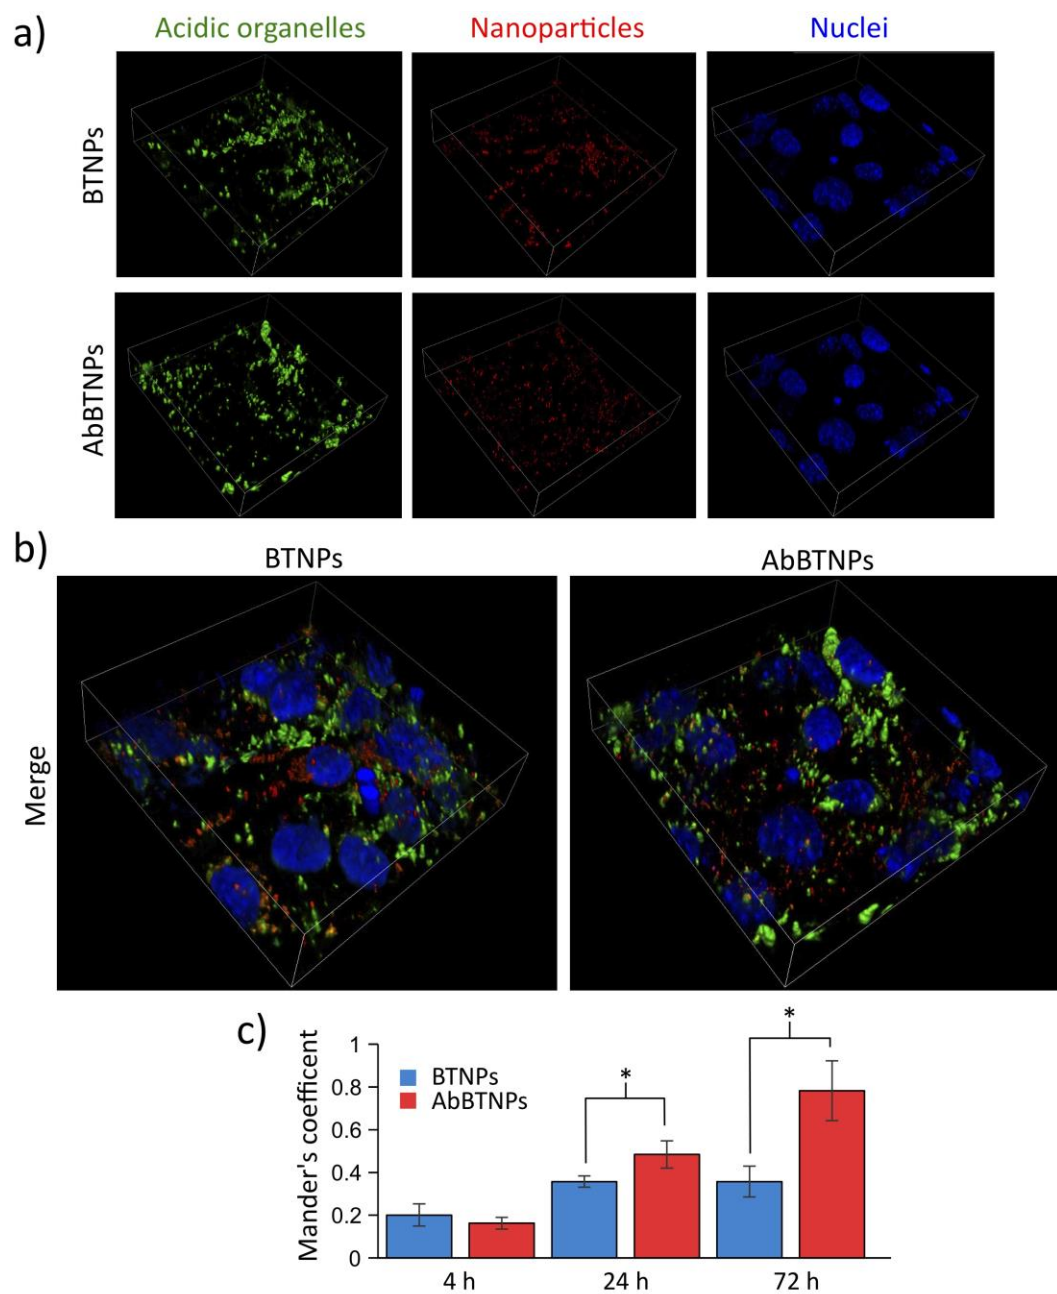

**Figure S7.** 3D reconstructions of confocal Z-stack acquisitions of nanoparticles (BTNPs / AbBTNPs, in red) and of bEnd.3 acidic organelles (in green). Separated and merged signals are respectively shown in a) and b). c) Co-localization analysis showing Mander's coefficients at different incubation points (4, 24 and 72 h).

**Table S1.** Stretching frequencies of the most relevant vibrations of plain and functionalized BTNPs.

| <b>Wavenumber (cm<sup>-1</sup>) range</b> | <b>Vibrations/Description</b> |
|-------------------------------------------|-------------------------------|
| 530 - 600                                 | Ti-O (BaTiO <sub>3</sub> )    |
| 1450                                      | C-O (BaCO <sub>3</sub> )      |
| 1000 - 1100                               | C-O-C and C-O-H stretching    |
| 1600 - 1670                               | Amide I (C=O stretching)      |
| 1300 - 1460                               | Amide III                     |
| 2280 - 2400                               | C-H stretching                |
| 2850 - 3000                               | C-H stretching                |
| 3320                                      | Amide A (N-H stretching)      |

**Video S1.** Fluorescence time lapses of  $\text{Ca}^{2+}$  imaging performed following US stimulation, Pseudo-color intensity indicates  $F/F_0$ . Total duration of the time lapse = 40 min.

**Video S2.** Fluorescence time lapses of  $\text{Ca}^{2+}$  imaging performed following AbBTNPs+US stimulation. Pseudo-color intensity indicates  $F/F_0$ . Total duration of the time lapse = 40 min.
